# Supplementary material
Source: PubMed Central journal article supplement (PMC11113891)

### ***Online resources***

#### **Cyclin A2, a novel regulator of EMT, Cellular and Molecular Life Sciences**

Nawal Bendris<sup>1-2</sup>, Caroline T. Cheung<sup>1</sup>, Hon Sing Leong<sup>3</sup>, John D. Lewis<sup>3</sup>, Ann F. Chambers<sup>3</sup>, Jean Marie Blanchard<sup>1\*</sup> & Bénédicte Lemmers<sup>1\*</sup>

1- Institut de Génétique Moléculaire de Montpellier, CNRS, 1919 route de Mende, 34293 Montpellier, France. Université Montpellier 2, Place Eugène Bataillon, 34095 Montpellier, France . Université Montpellier 1, 5 Bd Henry IV, 34967 Montpellier, France.

2- UT Southwestern Medical Center, Dept of Cell Biology, 5323 Harry Hines Blvd, Dallas TX 75235, USA.

3-Translational Prostate Cancer Research Group, London Regional Cancer Program, London, Ontario, Canada

\* Co-corresponding authors: [jean-marie.blanchard@igmm.cnrs.fr](mailto:jean-marie.blanchard@igmm.cnrs.fr) and [benedicte.lemmers@igmm.cnrs.fr](mailto:benedicte.lemmers@igmm.cnrs.fr)

#### **Online resource 1: Cyclin A2 depletion in NMuMG cells leads to a slight accumulation in S phase and reduced CDK1 and CDK2 activities.**

**a.** Cell cycle analysis by FACS of sh CycA2 NMuMG cells by comparison to sh Luc NMuMG cells. Even if we do not detect much difference in cell growth, shCycA2 cells present a slight accumulation in S phase (n=3, \*P=0.05) and subsequent reduction of the G2M fraction (n=3, \*P=0.05). **b.** Quantification of the FACS analysis shown as percentage of cells in each phase for both genotypes. **c.** CDK1 and CDK2 kinase activities shown as counts per minutes (cpm). Sh CycA2 cells show decreased CDK2 kinase activity (n=3, \*P=0.0127) which correlates with the accumulation of the cells in S phase. They also show decreased CDK1 activity (n=3, \*\*P=0.0014) which could be due to the decreased proportion of cells in G2M phase. Data are represented as mean  $\pm$  SEM.

#### **Online resource 2: cell growth and morphology following Cyclin A2 depletion in epithelial cells.**

**a,** Growth of NMuMG cells following Cyclin A2 depletion was measured every day for a week (n=3). **b,** Light microscopy of epithelial cells after Cyclin A2 knockdown. Cyclin A2 inactivation induces a spindle-like morphology in NMuMG cells cultivated in collagen, i.e. 3D matrix or 2D monolayer in BMEL and 67NR cells. Scale bars: 100 $\mu$ m.

**Online resource 3: Mesenchymal traits induced by Cyclin A2 inactivation are rescued by Wt-Cyclin A2.**

**a.** Immunofluorescence analysis of E-Cadherin and p120 Catenin cellular localization which are disturbed in sh CycA2+PMSCV cells by comparison to sh Luc+PMSCV, and restored in sh CycA2+Wt-CycA2 Flag NMuMG cells. Scale bars: 100 $\mu$ m. **b.** Western blot analysis (left panel) and quantification (right panel) of the non phosphorylated active  $\beta$  Catenin isoform. Active  $\beta$  Catenin is increased in absence of Cyclin A2 (n=3, \*\*\*P<0.0001) and returns to control levels following reintroduction of Wt-Cyclin A2 (n=3, \*\*P=0.0019). **c.** The increased invasion induced by Cyclin A2 inactivation (n=3, \*\*P=0.005) is rescued by Wt-Cyclin A2 (n=3, \*P=0.0196). Data are represented as mean  $\pm$  SEM.

**Online resource 4: Cyclin A2 depletion in NMuMG cells leads to increased invasion and RhoC activity.**

**a,** Invasion of sh Luc and sh CycA2 NMuMGRasV12 cells in collagen was performed as mentioned above and measured 24h after plating the cells (n=3, \*\*\*P=0.0004). **b,** RhoC activity was measured by quantifying the RhoGTP active forms pulled down by Rhotekin-beads in cell extracts corresponding to the different genotypes (n=3, \*P=0.03). Data are represented as mean  $\pm$  SEM.

**Online resource 5: Cooperation of Cyclin A2 inactivation and RasV12 expression in the induction of some mesenchymal traits.** Analysis of E-cadherin, N-Cadherin, Slug, MMP3, Nanog and Oct 4 mRNA levels in sh CycA2 NMuMGRasV12 cells over PMSCV sh CycA2 NMuMG cells.

**Online resource 6: Increased resistance to anoikis of sh CycA2 NMuMGRasV12 cells.**

**Upper panel:** Cell death of sh Luc and sh CycA2 NMuMGRasV12 cells was measured by FACS analysis following 7AAD staining and after 12h of culture in non-adherent conditions. **Lower panel:** Quantification of cell death expressed as percentage of dead cells detected by 7AAD (n=3, \*P=0.05).

**a.**

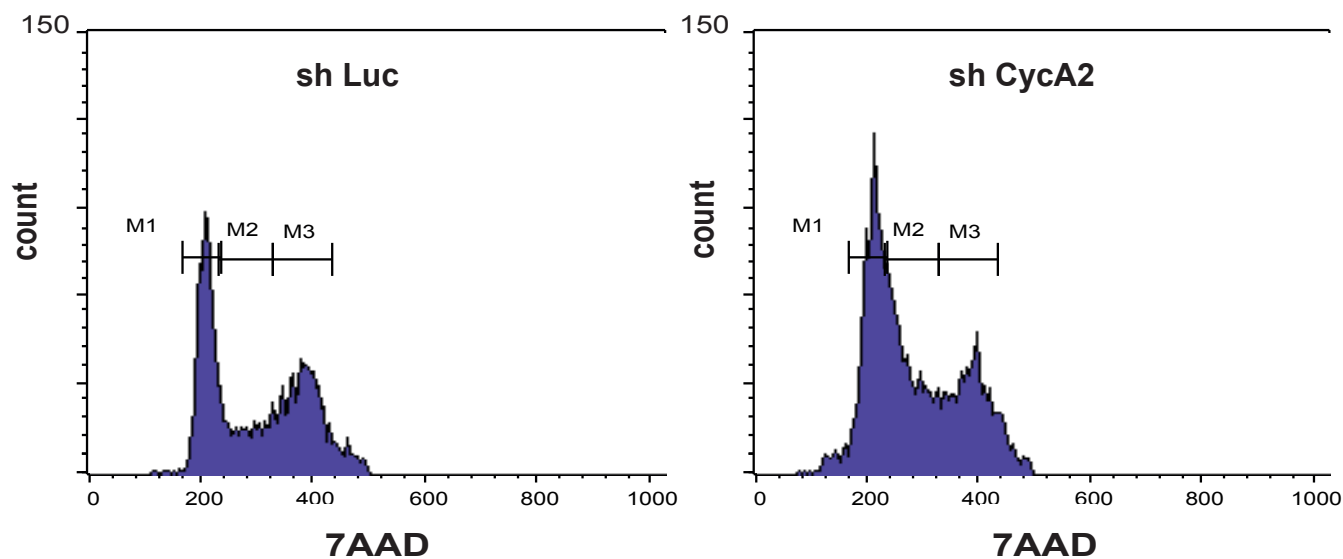

**b.**

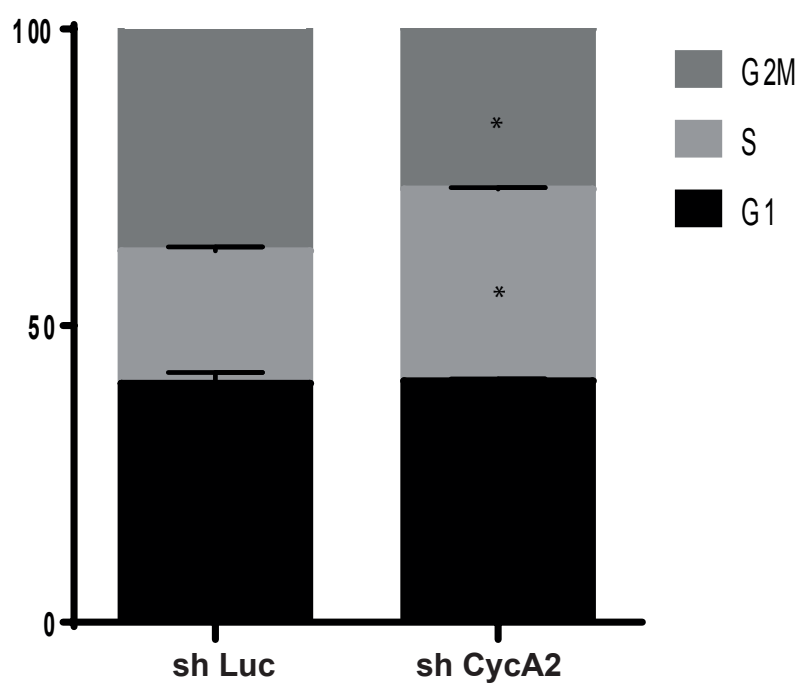

**c.**

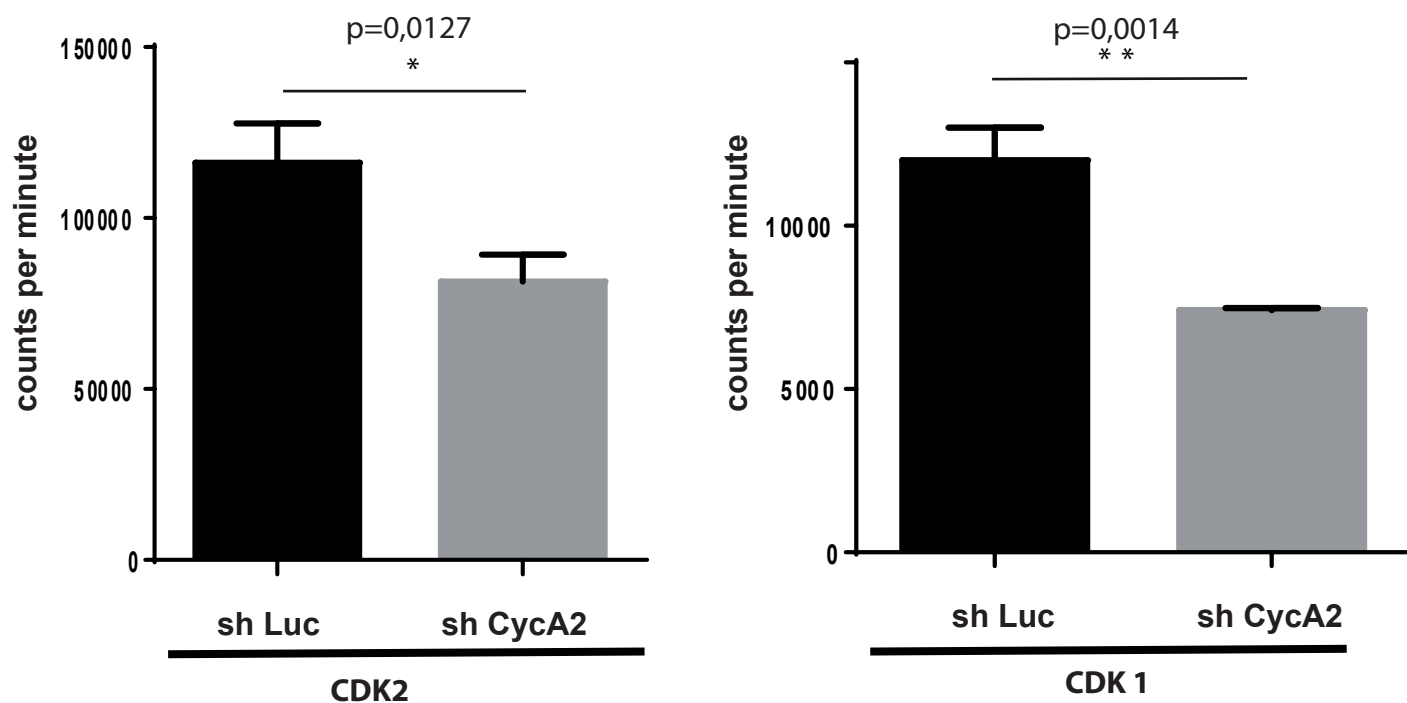

**a.**

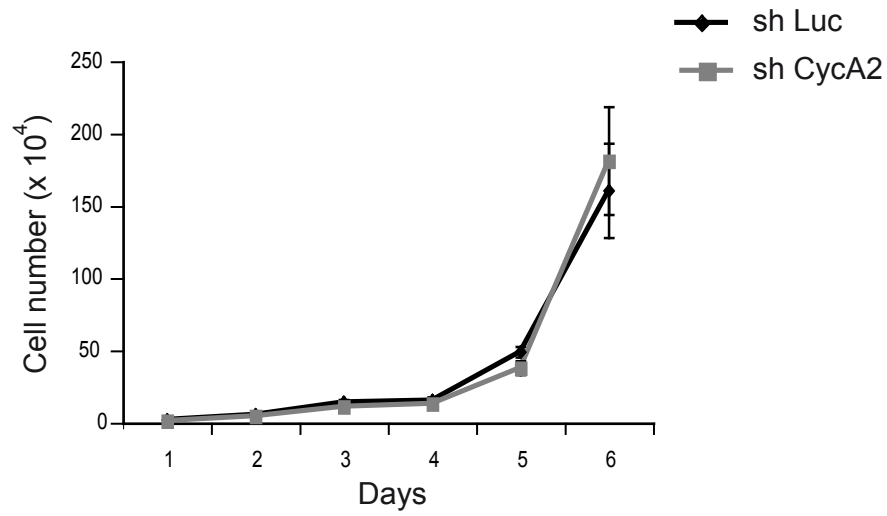

**b.**

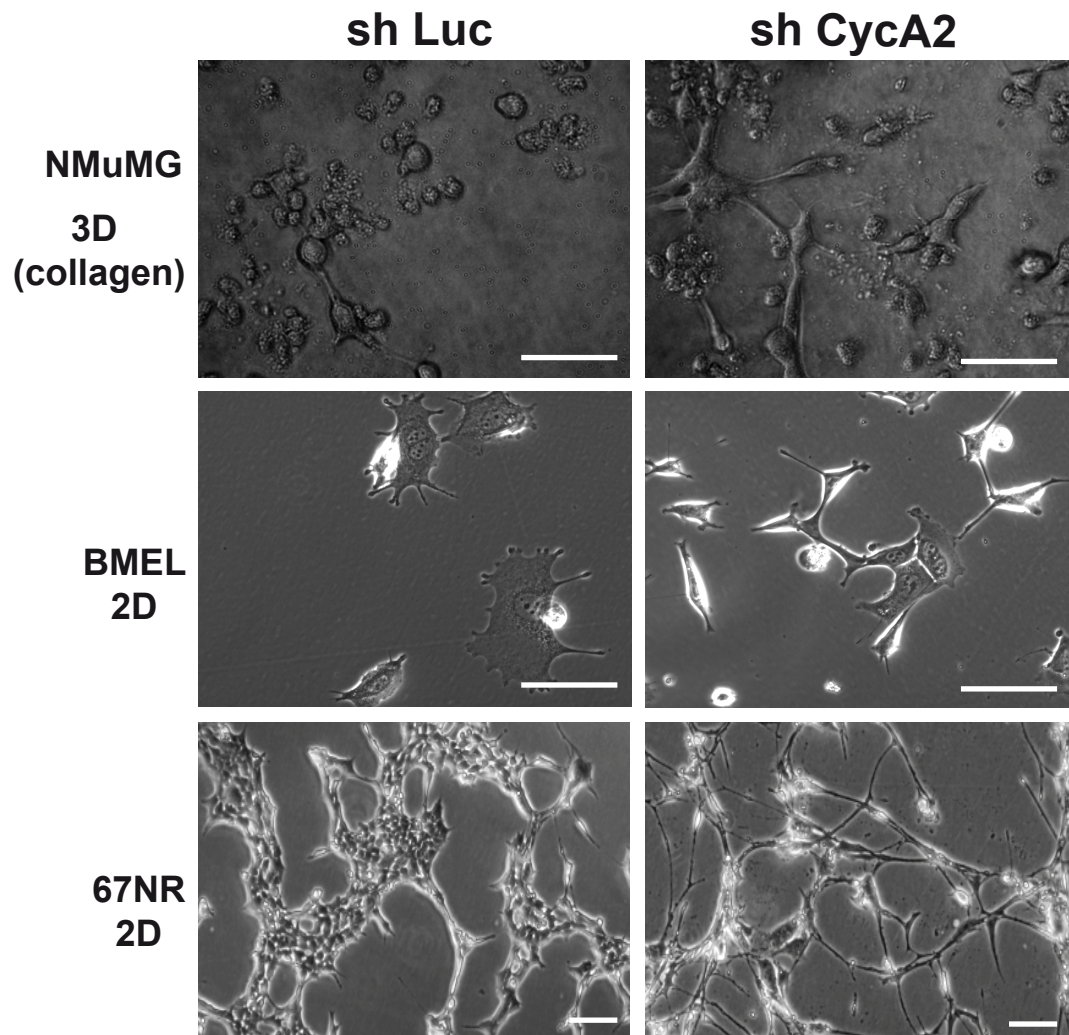

**a.**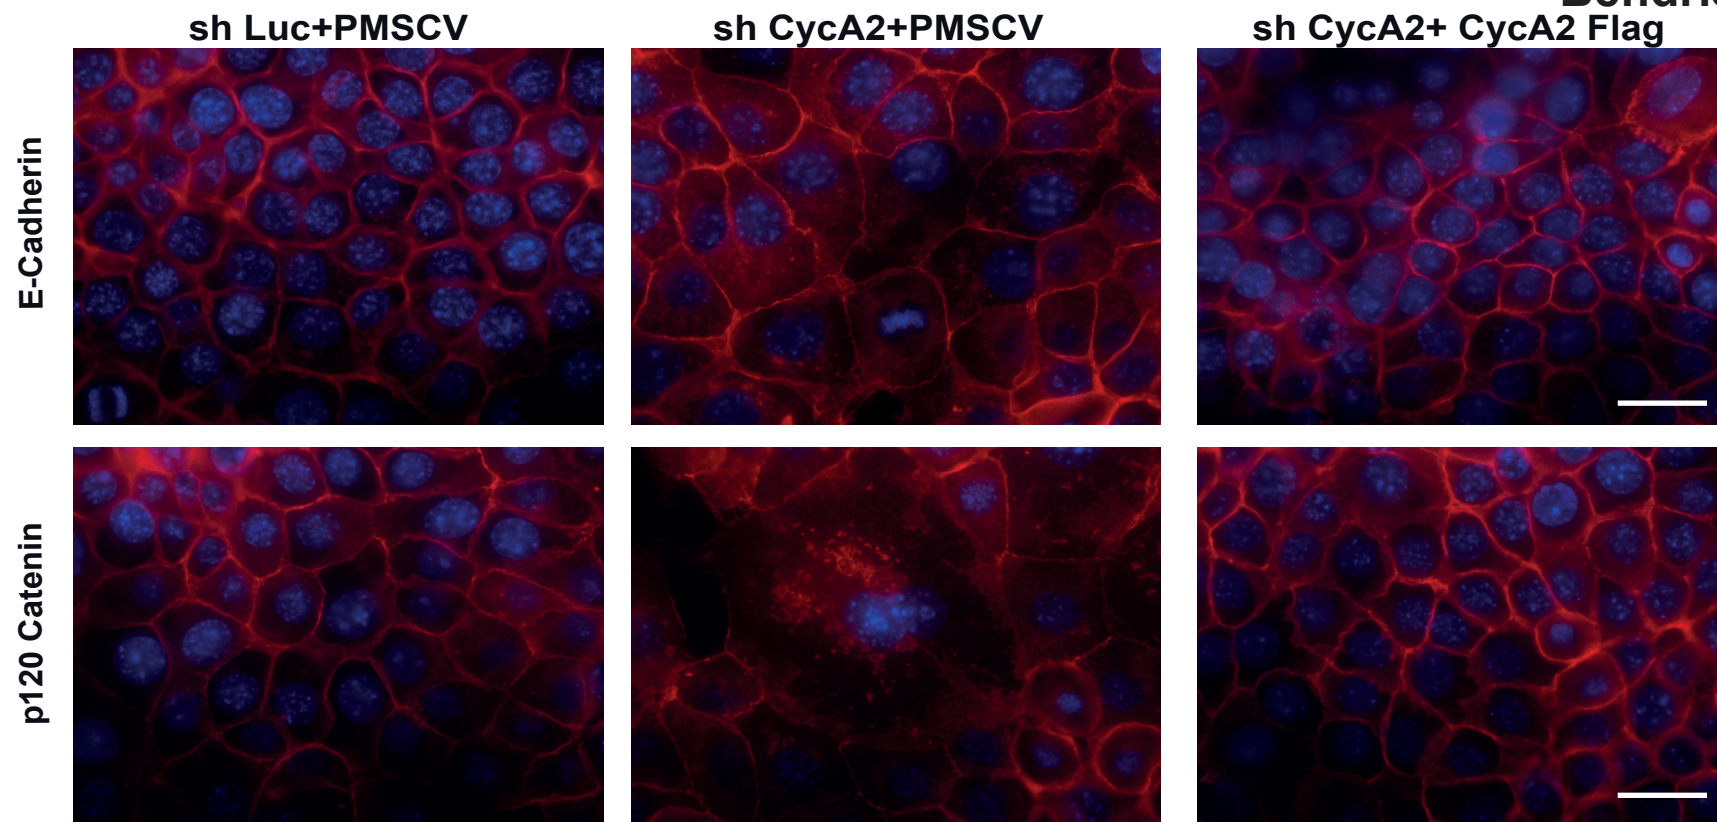**b.**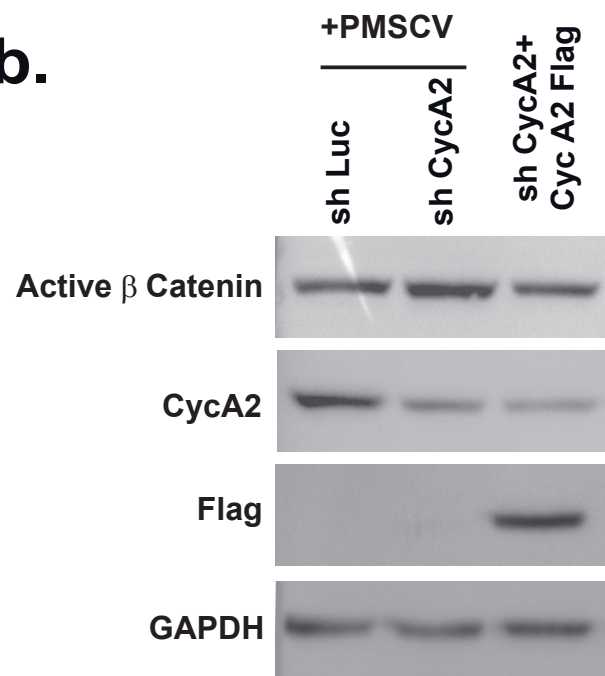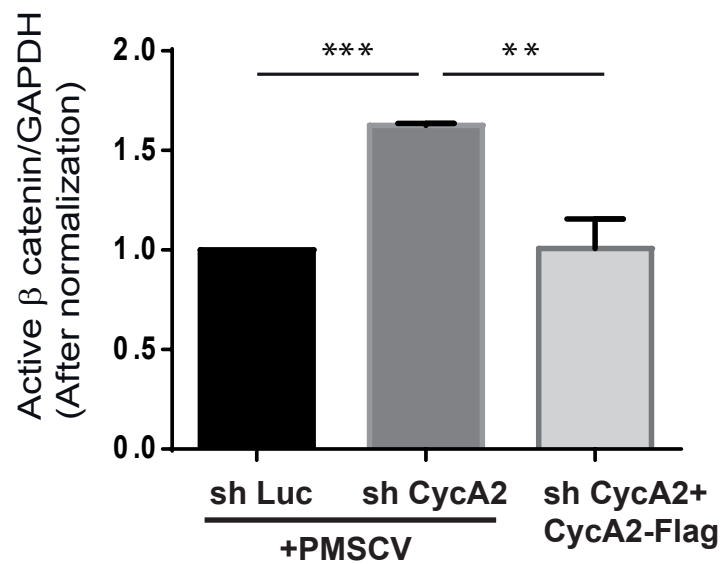**c.**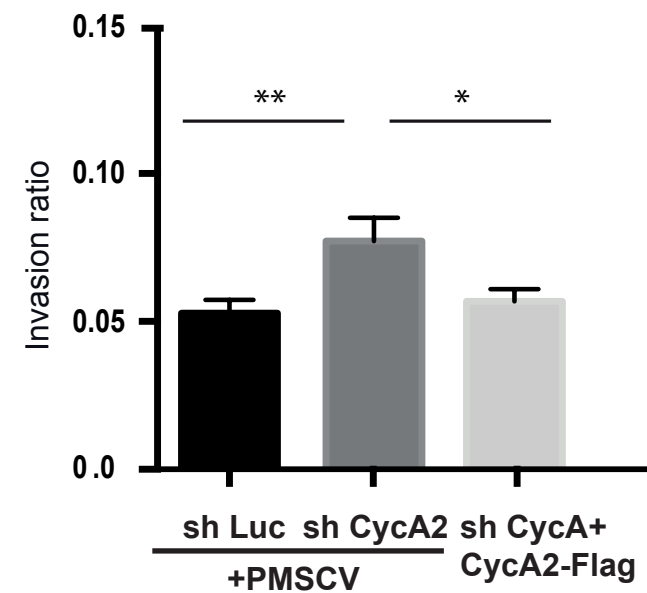

a.

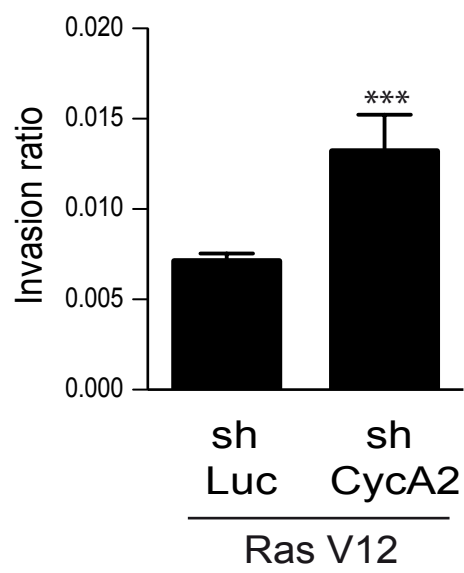

b.

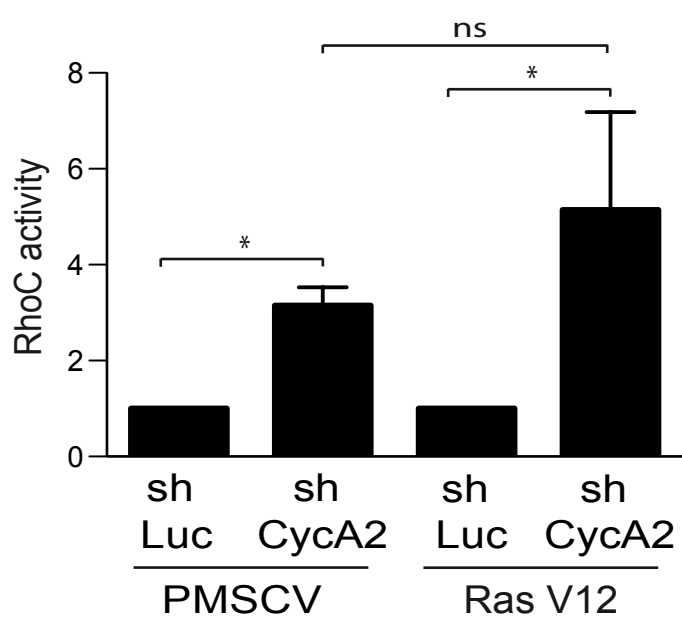

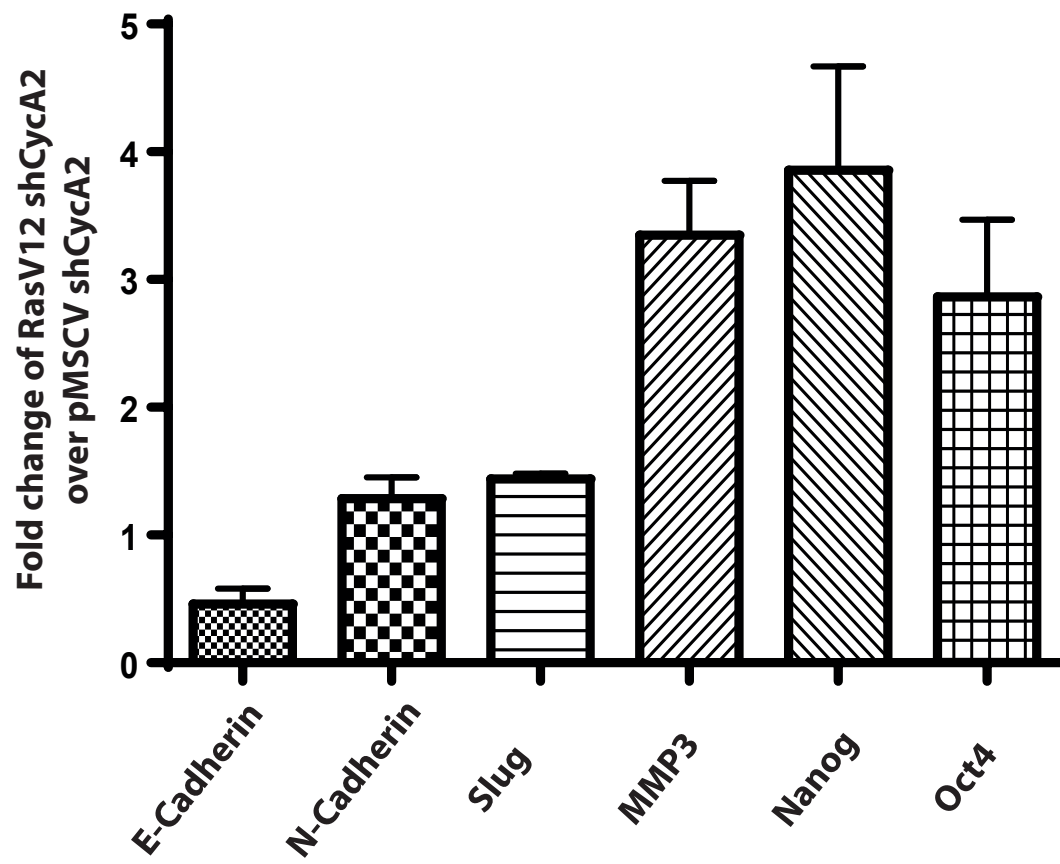

sh Luc

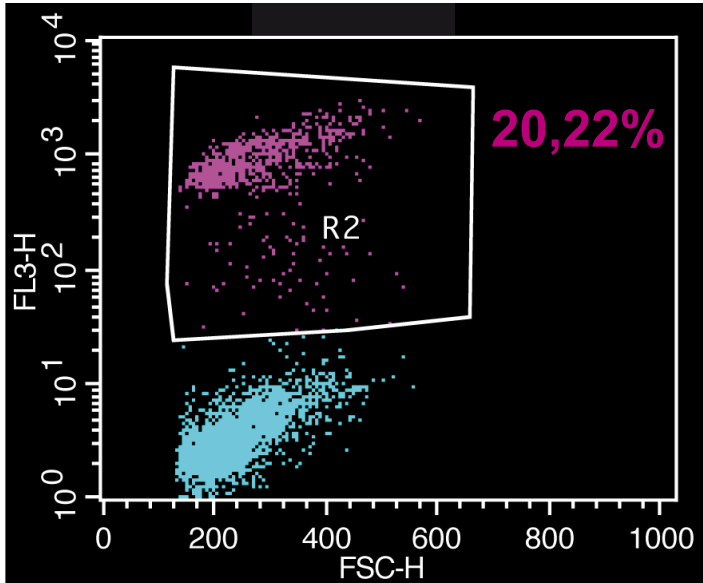

sh CycA2

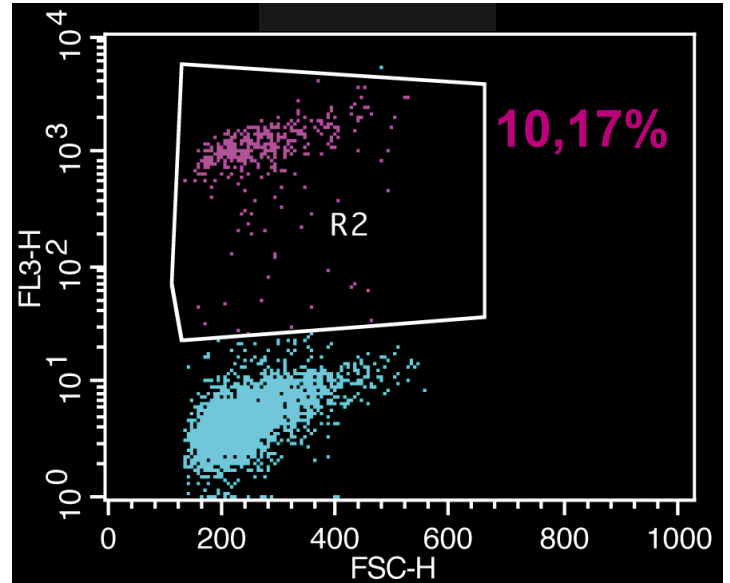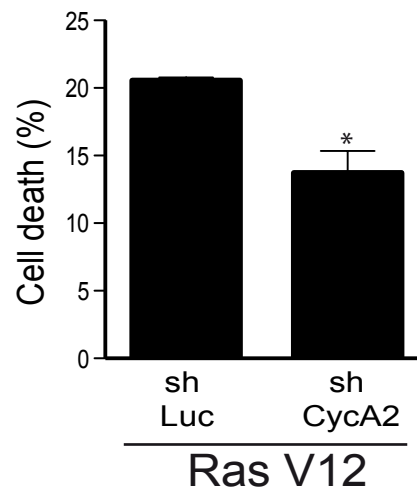

Supplement: 18_2014_1654_MOESM3_ESM.pdf [file 18_2014_1654_MOESM3_ESM.pdf]
